# Supplementary material for: MicroRNAs of the mir-17~92 cluster regulate multiple aspects of pancreatic tumor development and progression
Source: PubMed Central journal article supplement (PMC5482626; doi:10.18632/oncotarget.16277), 2017-03-16
Supplement: oncotarget-08-35902-s001.pdf [file oncotarget-08-35902-s001.pdf]

## MicroRNAs of the *mir-17~92* cluster regulate multiple aspects of pancreatic tumor development and progression

### Supplementary Materials

**Supplementary Table 1: Pathological characterization of KPC and 17KPC tumors**

| Case #  | Genotype | Pred. Invasive | Other Invasive | % Invasive | Structures Invaded  |
|---------|----------|----------------|----------------|------------|---------------------|
| 8657    | 17KPC    | Tub            | Sarc           | 75         | n/a                 |
| 8745 #3 | 17KPC    | Sarc           | Tub            | 60         | n/a                 |
| 8849 #3 | 17KPC    | Sarc           | Tub            | 90         | Duod ME             |
| 8860 #2 | 17KPC    | Sarc           | Tub            | 60         | fSt ME, LN, Duod SM |
| 8964 #1 | 17KPC    | Tub            | Sarc           | 30         | LN                  |
| 8964 #3 | 17KPC    | Tub            | Sarc           | 40         | LN                  |
| 8965 #2 | 17KPC    | Sarc           | Tub            | 60         | Duod SM             |
| 8965 #3 | 17KPC    | Tub            | Sarc           | 70         | LN, Colon Muc       |
| 9025 #2 | 17KPC    | Sarc           | Tub            | 70         | Stom SM             |
| 9096 #1 | 17KPC    | Sarc           | Tub            | 70         | Kid Pelvis, Duod SM |
| 9096 #2 | 17KPC    | Sarc           | Tub            | 40         | n/a                 |
| 9158 #4 | 17KPC    | Sarc           | Tub            | 30         | Duod ME             |
| 9327 #3 | 17KPC    | Sarc           | Tub            | 70         | n/a                 |
| 9486 #3 | 17KPC    | Sarc           | Tub            | 70         | n/a                 |
| 9975 #1 | 17KPC    | Sarc           | n/a            | 40         | Duod ME             |
| 9976 #1 | 17KPC    | Sarc           | Tub            | 50         | Duod Muc, LN        |
| 9237 #1 | KPC      | Tub            | Sarc           | 60         | Duod Muc            |
| 9248 #1 | KPC      | Tub            | Sarc/Cyst      | 70         | LN , fSt ME         |
| 9249 #2 | KPC      | Sarc           | Tub            | 70         | Duod SM             |
| 9414 #3 | KPC      | Sarc           | n/a            | 10         | n/a                 |
| 9415 #2 | KPC      | Sarc           | Tub            | 60         | Liver               |
| 9529 #1 | KPC      | Sarc           | n/a            | 90         | LN, Vein            |
| 9530 #1 | KPC      | Sarc           | Tub            | 60         | Liver, Vein         |
| 9550 #2 | KPC      | Tub            | Sarc           | < 10       | n/a                 |
| 9551 #4 | KPC      | Tub            | Sarc           | 20         | Duod Muc            |
| 9619 #5 | KPC      | Sarc           | Tub            | 60         | Duod Muc            |
| 9666 #1 | KPC      | Tub            | Sarc           | 60         | LN, fSt ME          |
| 9739 #3 | KPC      | Sarc           | Tub            | 80         | Colon ME            |
| 9762 #3 | KPC      | Sarc           | n/a            | < 10       | n/a                 |
| 9846 #1 | KPC      | Sarc           | Tub            | 10         | n/a                 |
| 9909 #3 | KPC      | Sarc           | Tub            | 90         | n/a                 |
| 9910 #1 | KPC      | Sarc           | Tub            | 30         | n/a                 |
| 9910 #2 | KPC      | Sarc           | Tub            | 70         | n/a                 |

Representative sections of each tumor were analyzed by a licensed pathologist to determine the predominant and subsidiary histological phenotypes of invasive carcinoma, as well as the percentage of the tumor area that was invasive. Anatomical structures invaded by the tumor are also noted. Tub = tubular, Sarc = sarcomatoid, Cyst = Cystic, Duod = duodenum, LN = lymph node, Stom = stomach, fSt = forestomach, Kid = kidney, ME = muscularis externa, SM = submucosa, Muc = Mucosa.

**Supplementary Table 2: Antibodies and conditions**

| <b>Antibody</b>       |                             |                             |                      |             |             |
|-----------------------|-----------------------------|-----------------------------|----------------------|-------------|-------------|
|                       | <b>Stain</b>                | <b>Cat. Number</b>          | <b>Concentration</b> | <b>Time</b> | <b>Temp</b> |
| Co-immunofluorescence | anti-Insulin                | Dako A0564                  | 1:500                | 4 hr        | RT          |
|                       | anti-Glucagon               | Dako A0565                  | 1:50                 | 4 hr        | RT          |
|                       | Alexa-fluor-594 anti-rabbit | ab150080                    | 1:250                | 1 hr        | RT          |
|                       | FITC anti-guinea            | Jackson Immuno: 706-095-148 | 1:500                | 1 hr        | RT          |
|                       | anti-Cortactin              | Millipore 05-180            | 1:200                | 1 hr        | RT          |
|                       | anti-Paxillin               | SC-5574                     | 1:200                | 1 hr        | RT          |
|                       | TRITC-phalloidin            | Invitrogen #R415            | 1:1000               | 1 hr        | RT          |
| Immunohistochemistry  | anti-ki67                   | ab66155                     | 1:600                | 4 hr        | RT          |
|                       | anti-CC3                    | cs-9664                     | 1:800                | 4 hr        | RT          |
|                       | anti-pAKT <sup>T308</sup>   | CST-4056                    | 1:200                | 1 hr        | RT          |
|                       | anti-pAKT <sup>S473</sup>   | CST-4060                    | 1:400                | O/N         | 4°C         |
|                       | anti-pERK                   | CST-9101                    | 1:400                | 1 hr        | RT          |
|                       | anti-pMEK 1/2               | SC-7995                     | 1:1000               | 1 hr        | RT          |
| Immunoblotting        | anti- $\alpha$ -tubulin     | DSHB 12G10                  | 1:1000               | O/N         | 4°C         |
|                       | anti-pERK                   | CST 9101                    | 1:2000               | O/N         | 4°C         |
|                       | anti-total ERK              | CST 9102                    | 1:1000               | O/N         | 4°C         |
|                       | anti-DUSP7                  | PA5-15553                   | 1:1000               | O/N         | 4°C         |
|                       | anti-DUSP10                 | ab140123                    | 1:2000               | O/N         | 4°C         |

Blocking were as follows: immunohistochemistry: 10% normal goat serum in PBS overnight at 4°C; immunoblotting: 5% milk in TBS-T except for anti-DUSP7 which was blocked in 5% BSA. RT: room temperature; O/N: overnight.

**Supplementary Table 3: Primers used in PCR reactions**

| Primer Name              | Primer Sequence (5'-3')                  |
|--------------------------|------------------------------------------|
| miR-17                   | CAAAGTGCTTACAGTGCAGGTAG                  |
| miR-106a                 | CAAAGTGCTAACAGTGCAGGTAG                  |
| miR-106b-5p              | TAAAGTGCTGACAGTGCAGAT                    |
| miR-20a                  | TAAAGTGCTTATAGTGCAGGTAG                  |
| miR-20b                  | CAAAGTGCTCATAGTGCAGGTAG                  |
| miR-93                   | CAAAGTGCTGTTTCGTGCAGGTAG                 |
| miR-19a/b                | TGTGCAAATCTATGCAAACTGA                   |
| miR-18a                  | TAAGGTGCATCTAGTGCAGATAG                  |
| miR-18b                  | TAAGGTGCATCTAGTGTCTGTTAG                 |
| miR-92                   | TATTGCACTTGTCCCGGCCTG                    |
| miR-25                   | CATTGCACTTGTCTCGGTCTGA                   |
| miR-363                  | AATTGCACGGTATCCATCTGTA                   |
| snoRNA234                | GATTTAACAAAAATTCGTCACTACCACTGAGA         |
| U6 snRNA (mmu/hsa)       | CATCTCGAGCTAATCTGGTGGG                   |
| RT Primer 1              | ACGCATCTATGCGCATATCG TTTTTTTTTTTTTTTT AA |
| RT Primer 2              | ACGCATCTATGCGCATATCG TTTTTTTTTTTTTTTT AC |
| RT Primer 3              | ACGCATCTATGCGCATATCG TTTTTTTTTTTTTTTT AG |
| RT Primer 4              | ACGCATCTATGCGCATATCG TTTTTTTTTTTTTTTT AT |
| RT Primer 5              | ACGCATCTATGCGCATATCG TTTTTTTTTTTTTTTT CA |
| RT Primer 6              | ACGCATCTATGCGCATATCG TTTTTTTTTTTTTTTT CC |
| RT Primer 7              | ACGCATCTATGCGCATATCG TTTTTTTTTTTTTTTT CG |
| RT Primer 8              | ACGCATCTATGCGCATATCG TTTTTTTTTTTTTTTT CT |
| RT Primer 9              | ACGCATCTATGCGCATATCG TTTTTTTTTTTTTTTT GA |
| RT Primer 10             | ACGCATCTATGCGCATATCG TTTTTTTTTTTTTTTT GC |
| RT Primer 11             | ACGCATCTATGCGCATATCG TTTTTTTTTTTTTTTT GG |
| RT Primer 12             | ACGCATCTATGCGCATATCG TTTTTTTTTTTTTTTT GT |
| Universal Reverse Primer | ACGCATCTATGCGCATATCG                     |
| DUSP7 Fow                | GACATGTTGCTAAGCGAGCG                     |
| DUSP7 Rev                | TCCAGCGAGCTCGGATTTAC                     |
| DUSP10 Fow               | GACCCTCAAGGCTGCGAATC                     |
| DUSP10 Rev               | GCTGCATCCGCAATTCAGG                      |

Primer sequences are provided for all qPCR primers used in the study. miRNA primers were derived according to the sequence of the mature mouse miRNA based on miRBase records. The primer for U6 snRNA is complementary to both human and mouse U6 RNA.

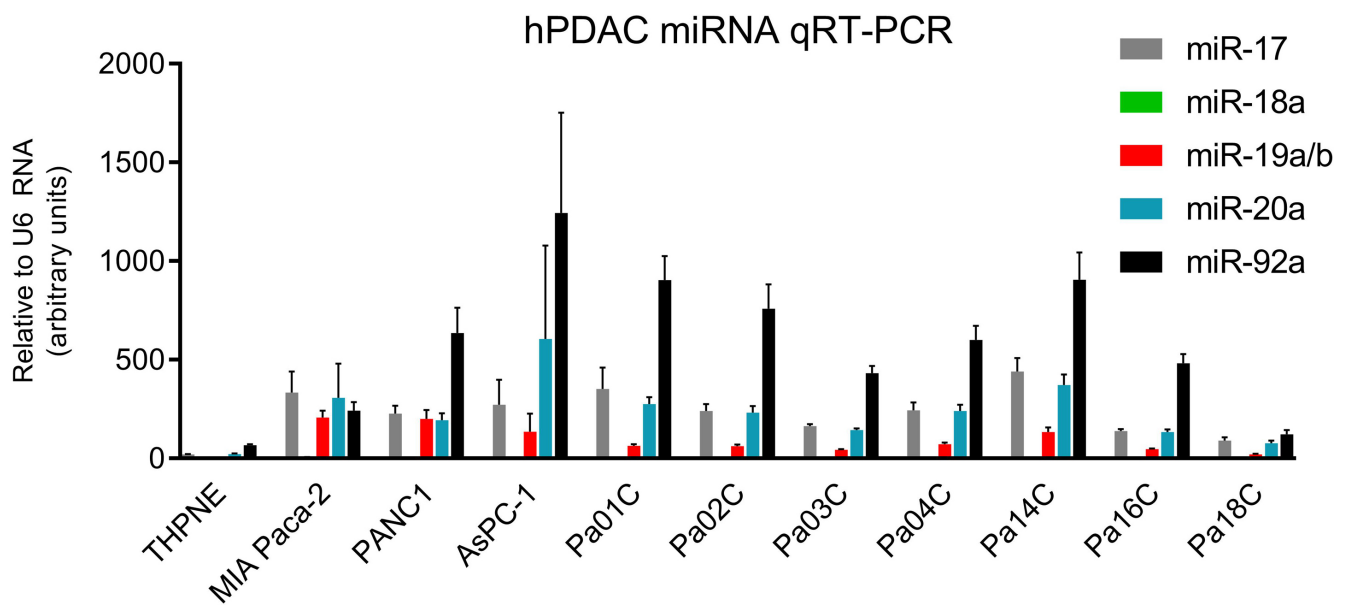

**Supplementary Figure 1: Human PDAC cell lines overexpress *mir-17~92*.** qRT-PCR for members of the *mir-17~92* cluster in human PDAC cell lines. miR-18 is poorly expressed compared to other members of the cluster and is not readily visualized on this scale. Error bars represent standard deviation from the mean.

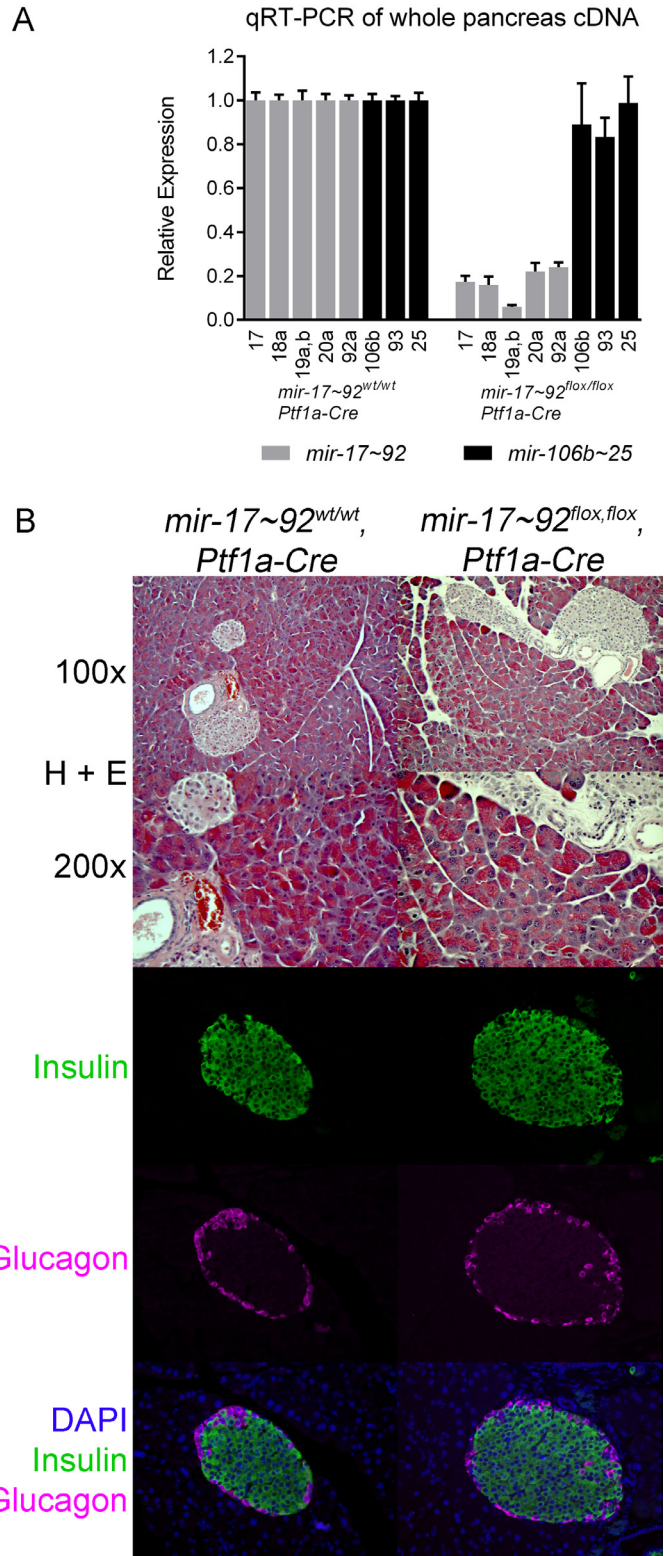

**Supplementary Figure 2: Homozygous loss of *mir-17~92* in the pancreas is developmentally tolerated.** (A) qRT-PCR measurement of levels of constituent *mir-17~92* miRNAs in pancreata from *mir-17~92<sup>lox/lox</sup>*, *Ptf1a-Cre* animals and control littermates. (B) Hematoxylin and eosin (H+E) staining of pancreata from *mir-17~92<sup>lox/lox</sup>*, *Ptf1a-Cre* animals and control littermates (top four panels). Immunofluorescence staining for the endocrine markers insulin and glucagon (lower six panels). Error bars represent standard deviation from the mean.

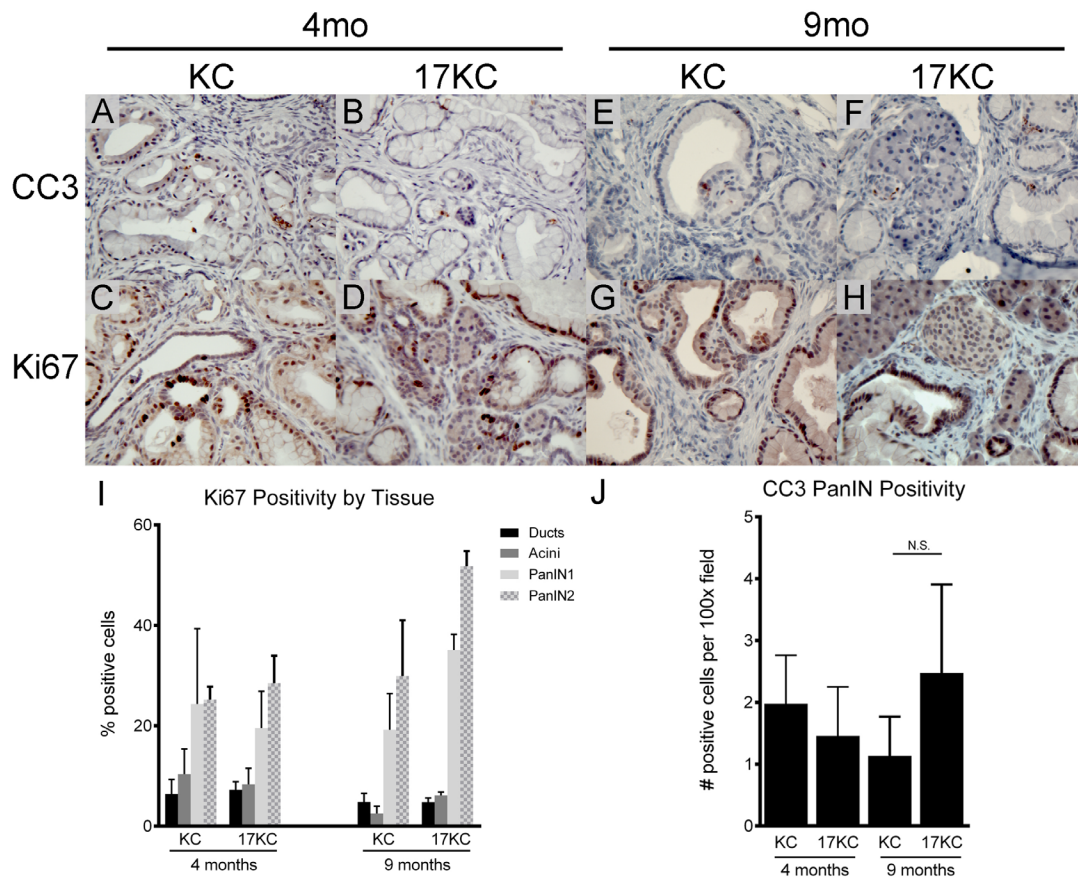

**Supplementary Figure 3: KC and 17KC PanINs display similar proliferation and apoptosis rates.** Immunohistochemistry for the apoptosis marker cleaved caspase 3 ('CC3'; A, B, E, F) and the proliferative marker Ki67 (C, D, G, H) in PanIN lesions from KC and 17KC pancreata. (I) Quantification of Ki67-positive nuclei. (J) Quantification of CC3-positive cells. Error bars represent standard deviation from the mean.

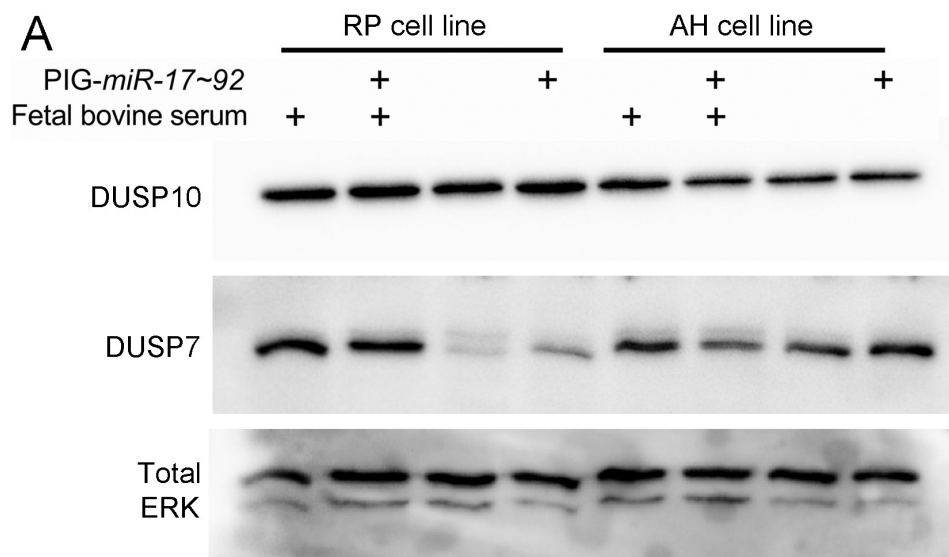

**Supplementary Figure 4: *mir-17~92* overexpression in PanIN cell lines is not associated with changes in DUSP expression.** Representative immunoblots for DUSP7 and DUSP10 in the PanIN cell lines RP2294 and AH2375 stably infected with PIG-*mir-17~92* or empty vector and grown under serum-free or serum replete conditions. Total ERK is used as a loading control.

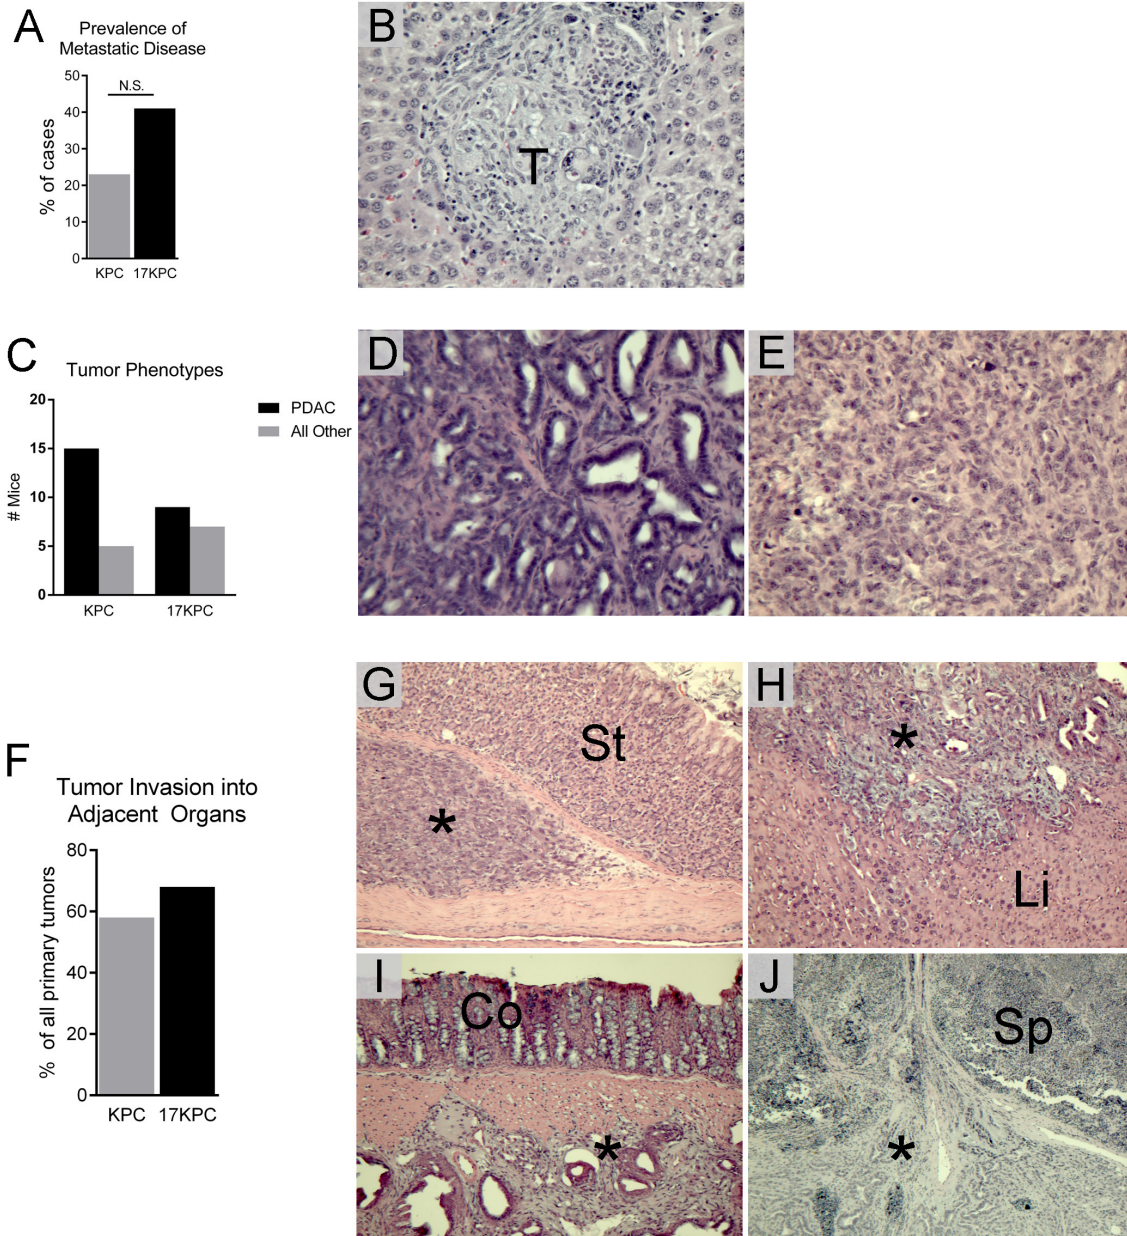

**Supplementary Figure 5: Loss of *mir-17~92* does not alter disease progression among unstratified individuals.** (A) Frequency of liver metastasis in KPC and 17KPC animals. (B) H&E stained section of a liver metastasis (denoted by T). (C) Frequency of ductal adenocarcinoma or other histology types in KPC and 17KPC mice. Examples of ductal adenocarcinoma (D) and poorly differentiated carcinoma (E) are provided. (F) Frequency of local invasion into adjacent structures within the abdomen by primary pancreatic tumors found in KPC and 17KPC mice. Tumors were capable of invading all portions of the stomach (G), liver (H), colon (I), and spleen (J). \* denotes invading carcinoma. Li = liver, St = stomach mucosa, Sp = spleen, Co = colon mucosa.

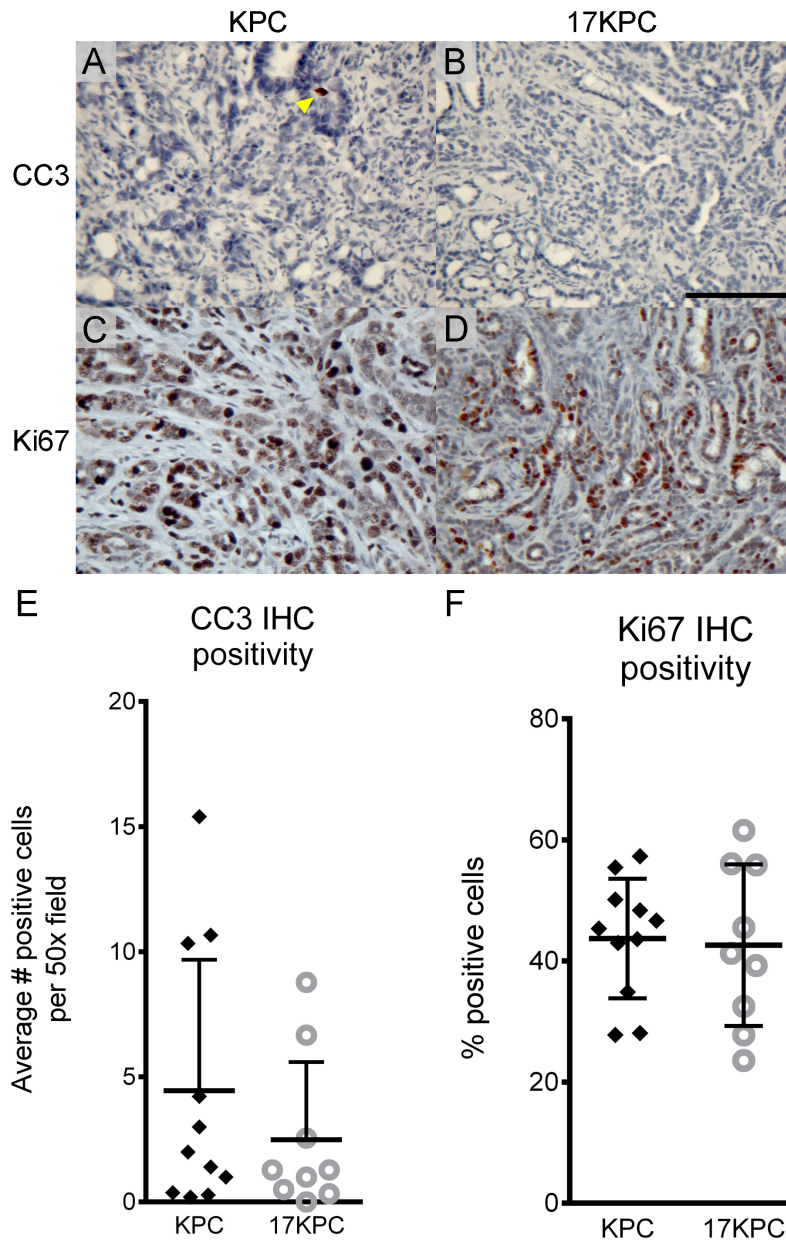

**Supplementary Figure 6: Immunohistochemical staining of tumors demonstrates equivalent spectra of proliferative and apoptotic rates.** (A, B) Immunohistochemical staining of KPC and 17KPC tumors for the apoptosis marker cleaved caspase 3 (CC3). (C, D) Immunohistochemical staining of KPC and 17KPC tumors for the proliferation marker Ki67. (E, F) Quantification of CC3 and Ki67 staining shown in A-D. Scale bar = 0.1mm. Yellow arrowhead in (A) indicates a rare CC3-positive nucleus. Error bars represent standard deviation from the mean.



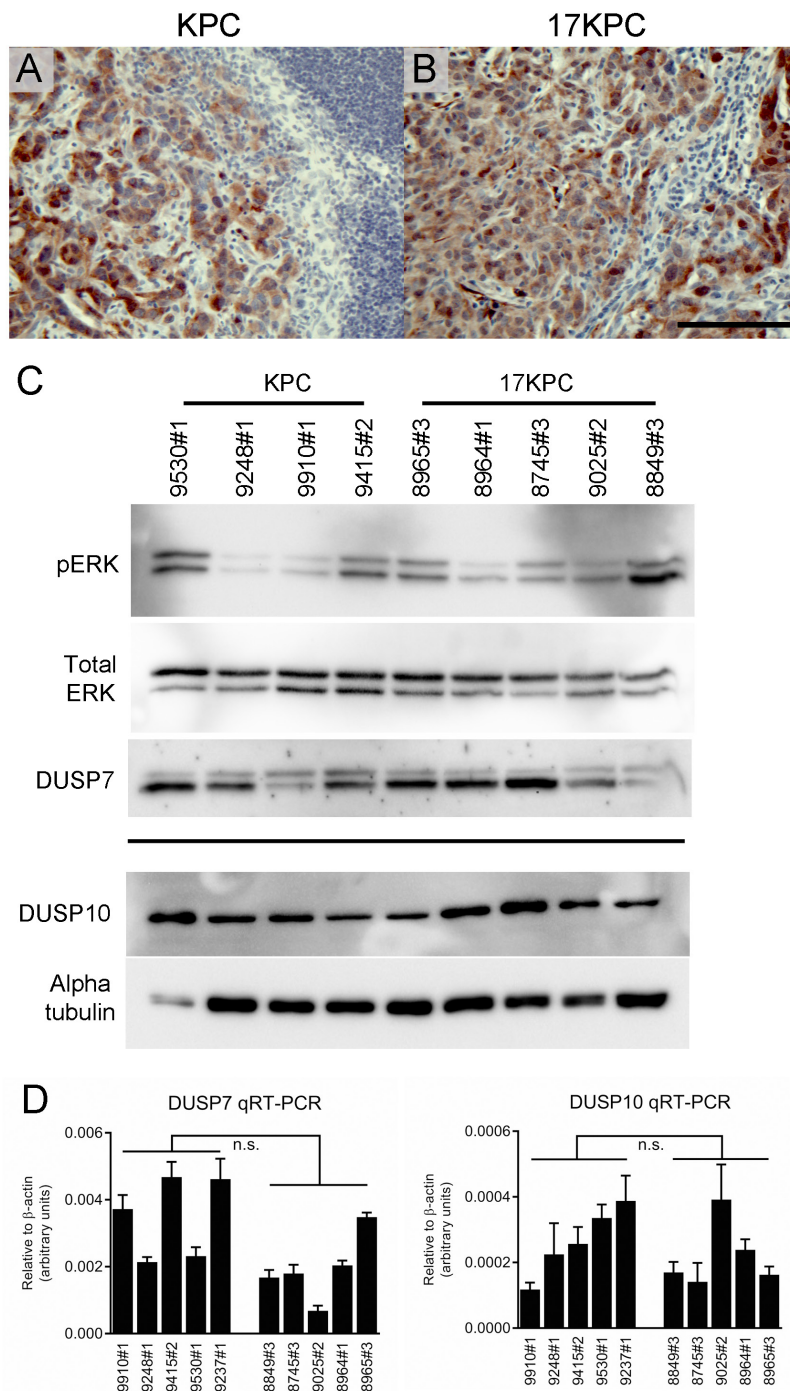

**Supplementary Figure 7: ERK activity does not differ between KPC and 17KPC tumors.** Immunohistochemical staining of KPC (A) and 17KPC (B) tumors for phosphorylated ERK. (C) Western blotting for pERK, DUSP7, and DUSP10 in KPC and 17KPC cell lines. Total ERK serves as loading control for the p-ERK and DUSP7 blots. Alpha tubulin is used as a loading control for the DUSP10 blot. (D) qRT-PCR for DUSP7 and DUSP10 mRNA levels in KPC and 17KPC cell lines. Scale bar = 0.1mm. Error bars represent standard deviation from the mean.

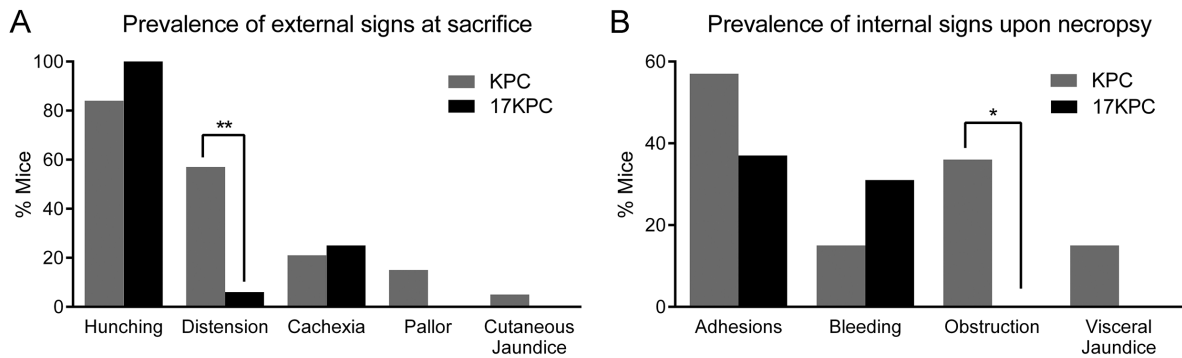

**Supplementary Figure 8: 17KPC mice do not develop gastrointestinal obstruction.** (A) Prevalence of externally visible signs of disease at time of euthanasia in KPC and 17KPC mice. (B) Prevalence of specific internal features noted at necropsy in KPC and 17KPC mice (notably one mouse in each cohort exhibited gross ascites upon necropsy; data not shown). *p* values: \* < 0.05, \*\* < 0.01 by Fisher's exact test.

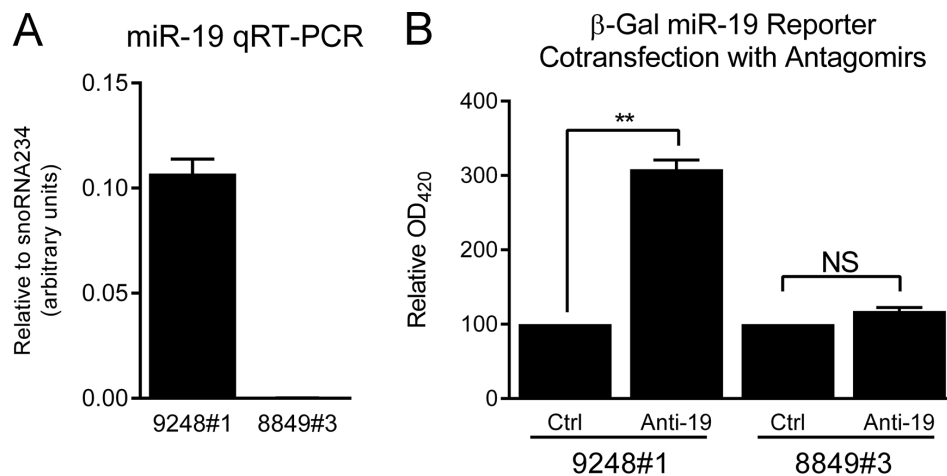

**Supplementary Figure 9: miR-19 antagomirs inhibit the activity of endogenous miR-19.** (A) Quantitative RT-PCR showing miR-19 levels in the KPC cell line 9248#1 and the 17KPC cell line 8849#3. (B) miR-19-responsive β-galactosidase reporter activity in the 9248#1 KPC cell line transfected with a control oligonucleotide or miR-19 antagomirs. miR-19-deficient 8849#3 cells are used as negative control. Relative density of the colorimetric reaction is plotted with control antagomir-treated samples set to 100. *p* values: \*\* < 0.01. Error bars represent standard deviation from the mean.

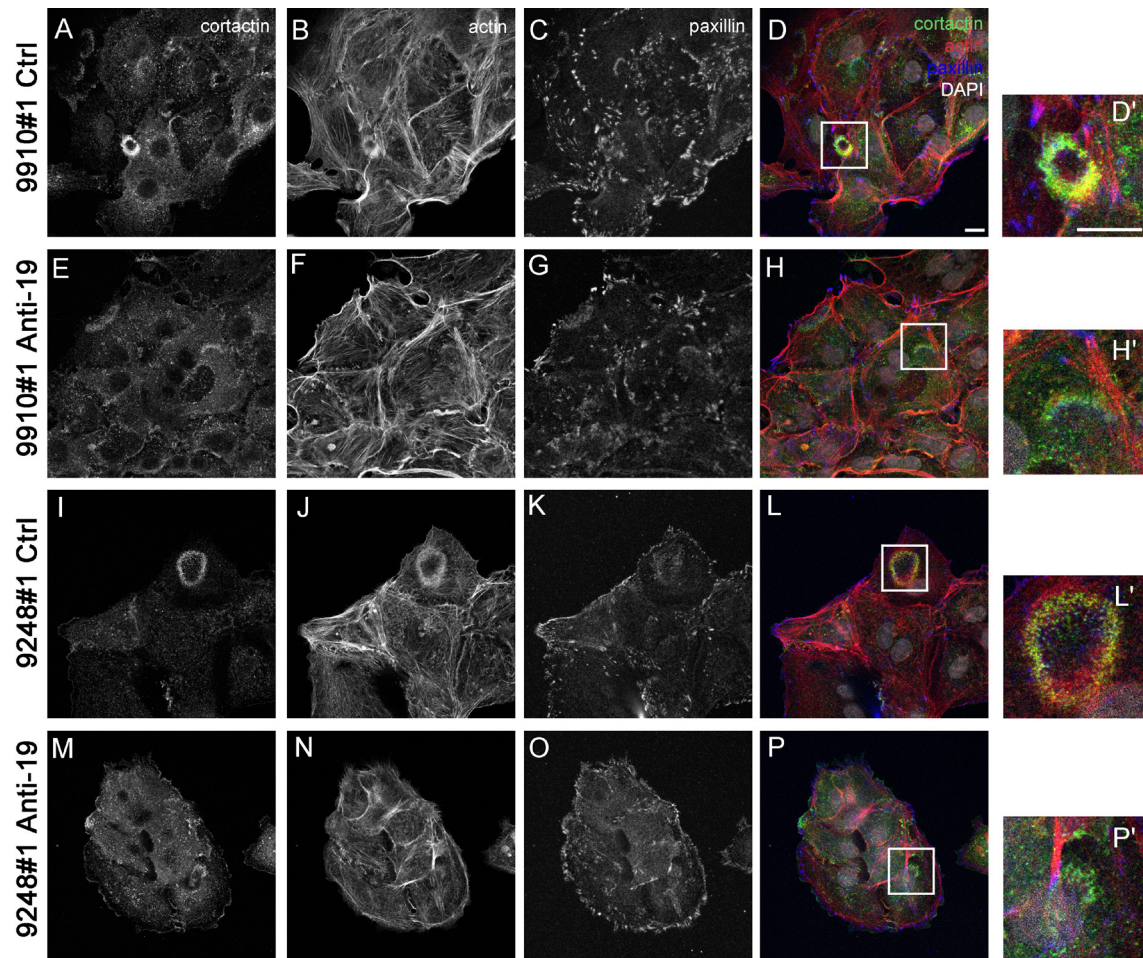

**Supplementary Figure 10: miR-19 antagonists reduce invadopodia rosette formation in KPC cell lines.** Immunofluorescent staining for the invadopodia constituent proteins cortactin (A, E, I, M), actin (B, F, J, N) and paxillin (C, G, K, O) in KPC cell lines treated with either control oligonucleotides (A–D, I–L) or miR-19 targeting antagonists (E–H, M–P). Merged fluorescent images are shown in (D, H, L) and (P). D, H, L and P are L (prime) and P (prime) higher magnification views of panels D, H, L, and P. Scale bar = 10  $\mu$ m.

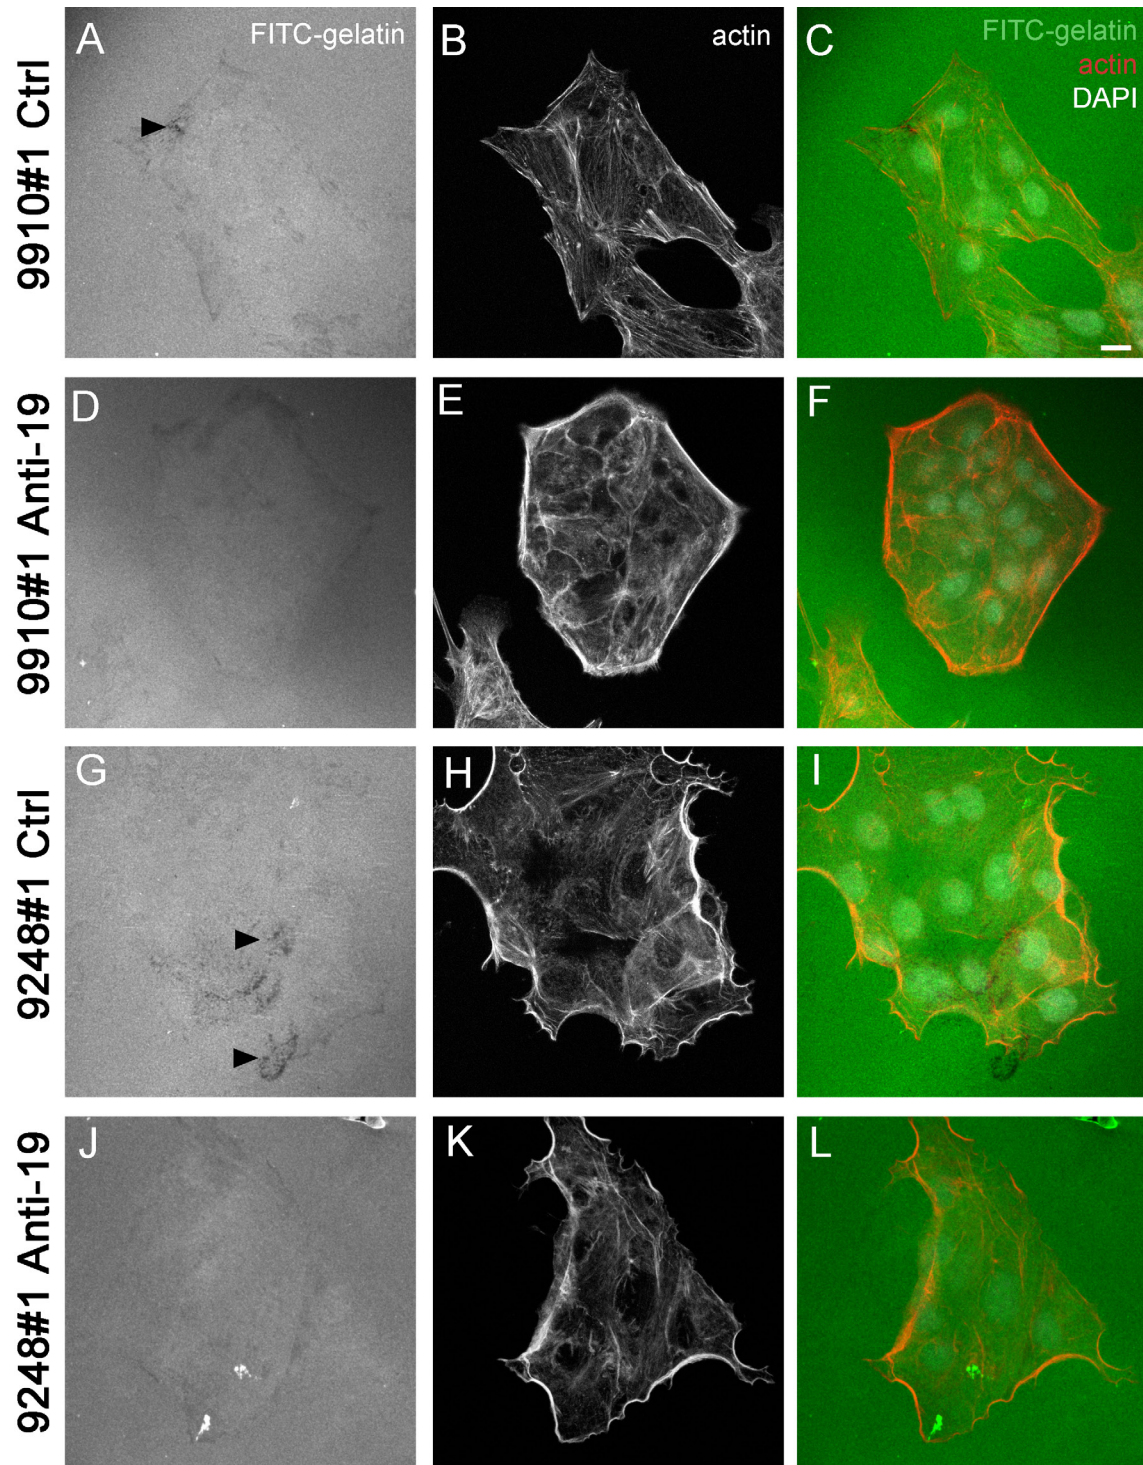

**Supplementary Figure 11: miR-19 antagomirs reduce gelatin degradation in KPC cell lines.** Areas of FITC-gelatin degradation, identified as dark regions (arrowheads), are shown for KPC cell lines treated with control oligonucleotides (**A–C**, **G–I**) or miR-19 antagomirs (**D–F**, **J–L**). Fluorescent staining for actin is used to identify cells on the FITC-gelatin (**B**, **E**, **H**, **K**). Merged images showing gelatin degradation, actin, and DAPI-stained nuclei are provided (**C**, **F**, **I**, **L**). Scale bar = 10  $\mu$ m.
